# Supplementary material for: Morphodynamics of the Actin-Rich Cytoskeleton in Entamoeba histolytica
Source: Front Cell Infect Microbiol. 2018 May 29;8:179. doi: 10.3389/fcimb.2018.00179 (PMC5986921; doi:10.3389/fcimb.2018.00179)
Supplement: Supplemental Table 1 — Proteins identified by proteomics. [file Table_1.XLSX]

## Sheet: Sheet1
Manich et al, 2018. Supplemental Table1. Proteins identified by proteomics
GENE ID	MAPPED ID-Uniprot	GENE NAME -ORTHOLOG	FAMILY/SUBFAMILY	PROTEIN CLASS
CYTOSKELETON
ENTHI|EnsemblGenome=EHI_111050|UniProtKB=C4M5I6	C4M5I6,C4M5I6_ENTHI	Actin-like protein, putative;EHI_111050;ortholog	ACTIN-RELATED PROTEIN 2 (PTHR11937:SF37)	actin and actin related protein(PC00039)
ENTHI|EnsemblGenome=EHI_045000|UniProtKB=C4LTB5	C4LTB5_ENTHI,C4LTB5	Actin-related protein 2/3 complex subunit 1A, putative;EHI_045000;ortholog	ACTIN RELATED COMPLEX P41 SUBUNIT (PTHR10709:SF2)	actin family cytoskeletal protein(PC00041)
ENTHI|EnsemblGenome=EHI_030820|UniProtKB=C4LSV0	C4LSV0_ENTHI,C4LSV0	Actin-related protein 2/3 complex subunit 4;EHI_030820;ortholog	ACTIN-RELATED PROTEIN 2/3 COMPLEX SUBUNIT 4 (PTHR22629:SF0)	actin family cytoskeletal protein(PC00041)
ENTHI|EnsemblGenome=EHI_198930|UniProtKB=C4LWT9	C4LWT9,C4LWT9_ENTHI	Actin, putative;EHI_198930;ortholog	ACTIN-RELATED PROTEIN 3 (PTHR11937:SF31)	actin and actin related protein(PC00039)
ENTHI|EnsemblGenome=EHI_136150|UniProtKB=C4M295	C4M295,C4M295_ENTHI	Adenylyl cyclase-associated protein;EHI_136150;ortholog	ADENYLYL CYCLASE-ASSOCIATED PROTEIN (PTHR10652:SF0)	actin family cytoskeletal protein(PC00041)
ENTHI|EnsemblGenome=EHI_091250|UniProtKB=C4M782	C4M782,C4M782_ENTHI	Arp2/3 complex 34 kDa subunit;EHI_091250;ortholog	ACTIN-RELATED PROTEIN 2/3 COMPLEX SUBUNIT 2 (PTHR12058:SF0)
ENTHI|EnsemblGenome=EHI_083590|UniProtKB=C4M943	C4M943_ENTHI,C4M943	Coronin;EHI_083590;ortholog	CORONIN-A (PTHR10856:SF39)
ENTHI|EnsemblGenome=EHI_167130|UniProtKB=C4LYB3	C4LYB3,C4LYB3_ENTHI	Filopodin, putative;EHI_167130;ortholog	RHEA, ISOFORM B (PTHR19981:SF1)
ENTHI|EnsemblGenome=EHI_001070|UniProtKB=C4M1I7	C4M1I7,C4M1I7_ENTHI	LIM zinc finger domain containing protein;EHI_001070;ortholog	PAXILLIN, ISOFORM F (PTHR24216:SF8)
ENTHI|EnsemblGenome=EHI_096420|UniProtKB=C4LWF5	C4LWF5_ENTHI,C4LWF5	LIM zinc finger domain containing protein;EHI_096420;ortholog	LIM DOMAIN-CONTAINING PROTEIN E (PTHR24206:SF56)	actin family cytoskeletal protein(PC00041)
ENTHI|EnsemblGenome=EHI_161940|UniProtKB=C4M6N7	C4M6N7,C4M6N7_ENTHI	LIM zinc finger domain containing protein;EHI_161940;ortholog	SUBFAMILY NOT NAMED (PTHR24206:SF55)	actin family cytoskeletal protein(PC00041)
ENTHI|EnsemblGenome=EHI_194520|UniProtKB=C4LZW4	C4LZW4,C4LZW4_ENTHI	LIM zinc finger domain containing protein;EHI_194520;ortholog	SUBFAMILY NOT NAMED (PTHR24215:SF22)	actin family cytoskeletal protein(PC00041)
ENTHI|EnsemblGenome=EHI_110180|UniProtKB=C4LU72	C4LU72,C4LU72_ENTHI	Myosin heavy chain;EHI_110180;ortholog	MYOSIN HEAVY CHAIN, MUSCLE (PTHR45615:SF27)
ENTHI|EnsemblGenome=EHI_176140|UniProtKB=C4MB21	C4MB21,C4MB21_ENTHI	Profilin;EHI_176140;ortholog	PROFILIN-1 (PTHR11604:SF19)	non-motor actin binding protein(PC00165)
ENTHI|EnsemblGenome=EHI_010530|UniProtKB=C4LYU0	C4LYU0_ENTHI,C4LYU0	Tubulin alpha chain;EHI_010530;ortholog	TUBULIN ALPHA-2 CHAIN-RELATED (PTHR11588:SF297)	tubulin(PC00228)
ENTHI|EnsemblGenome=EHI_049920|UniProtKB=C4LUJ0	C4LUJ0_ENTHI,C4LUJ0	Tubulin beta chain;EHI_049920;ortholog	TUBULIN BETA CHAIN (PTHR11588:SF9)	tubulin(PC00228)
SMALL GTPASES
ENTHI|EnsemblGenome=EHI_005460|UniProtKB=Q6AW60	Q6AW60_ENTHI,Q6AW60	EhRab11A protein;EhRAB11A;ortholog	DRAB11 (PTHR24073:SF87)
ENTHI|EnsemblGenome=EHI_067850|UniProtKB=Q5NT27	Q5NT27,Q5NT27_ENTHI	Rab family GTPase (Fragment);EhRab2C;ortholog	RAS-RELATED PROTEIN RAB-2A (PTHR24073:SF354)
ENTHI|EnsemblGenome=EHI_143650|UniProtKB=Q5NT41	Q5NT41_ENTHI,Q5NT41	Rab family GTPase (Fragment);EhRabC3;ortholog	RAS-RELATED PROTEIN RABA5C-RELATED (PTHR24073:SF898)
ENTHI|EnsemblGenome=EHI_177520|UniProtKB=Q5NT05	Q5NT05,Q5NT05_ENTHI	Rab family GTPase (Fragment);EhRabX11;ortholog	RAS-RELATED PROTEIN RAB-32 (PTHR24073:SF862)
ENTHI|EnsemblGenome=EHI_042250|UniProtKB=Q5NSZ9	Q5NSZ9,Q5NSZ9_ENTHI	Rab family GTPase (Fragment);EhRabX17;ortholog	RAS-RELATED PROTEIN RABA2B-RELATED (PTHR24073:SF873)
ENTHI|EnsemblGenome=EHI_108610|UniProtKB=Q9BLF3	Q9BLF3_ENTHI,Q9BLF3	Rab family GTPase;EhRab1A;ortholog	RAS-RELATED PROTEIN RAB-1B-RELATED (PTHR24073:SF854)
ENTHI|EnsemblGenome=EHI_153690|UniProtKB=Q9BLF2	Q9BLF2_ENTHI,Q9BLF2	Rab family GTPase;EhRabC1;ortholog	RAS-RELATED PROTEIN RABA5C-RELATED (PTHR24073:SF898)
ENTHI|EnsemblGenome=EHI_167060|UniProtKB=B1N309	B1N309_ENTHI,B1N309	Rab GDP dissociation inhibitor;EHI_167060;ortholog	RAB GDP DISSOCIATION INHIBITOR (PTHR11787:SF8)	G-protein modulator(PC00022);acyltransferase(PC00042)
ENTHI|EnsemblGenome=EHI_058090|UniProtKB=C4M8B0	C4M8B0,C4M8B0_ENTHI	Ras family GTPase;EHI_058090;ortholog	RAS-RELATED PROTEIN RAP-1B-RELATED (PTHR24070:SF393)	small GTPase(PC00208)
ENTHI|EnsemblGenome=EHI_015440|UniProtKB=C4M0Y0	C4M0Y0_ENTHI,C4M0Y0	Rho family GTPase;EHI_015440;ortholog	RAS-LIKE GTP-BINDING PROTEIN RHO1 (PTHR24072:SF168)	small GTPase(PC00208)
ENTHI|EnsemblGenome=EHI_129750|UniProtKB=C4M5Q7	C4M5Q7,C4M5Q7_ENTHI	Rho family GTPase;EHI_129750;ortholog	RAS-LIKE GTP-BINDING PROTEIN RHOL (PTHR24072:SF265)	small GTPase(PC00208)
ENTHI|EnsemblGenome=EHI_181250|UniProtKB=C4M5Z7	C4M5Z7_ENTHI,C4M5Z7	Rho family GTPase;EHI_181250;ortholog	RAS-LIKE GTP-BINDING PROTEIN RHOL (PTHR24072:SF265)	small GTPase(PC00208)
VESICLE TRAFFIC
ENTHI|EnsemblGenome=EHI_023600|UniProtKB=Q1EQ27	Q1EQ27_ENTHI,Q1EQ27	AP complex subunit beta;EHI_023600;ortholog	AP-1 COMPLEX SUBUNIT BETA-1 (PTHR11134:SF3)	membrane traffic protein(PC00150)
ENTHI|EnsemblGenome=EHI_124560|UniProtKB=B1N355	B1N355,B1N355_ENTHI	AP-2 complex subunit mu, putative;EHI_124560;ortholog	AP-2 COMPLEX SUBUNIT MU (PTHR10529:SF236)	extracellular matrix glycoprotein(PC00100);receptor(PC00197)
ENTHI|EnsemblGenome=EHI_130660|UniProtKB=C4LXE4	C4LXE4_ENTHI,C4LXE4	Autophagy-related protein;EHI_130660;ortholog	GAMMA-AMINOBUTYRIC ACID RECEPTOR-ASSOCIATED PROTEIN-LIKE 2 (PTHR10969:SF4)	non-motor microtubule binding protein(PC00166)
ENTHI|EnsemblGenome=EHI_058320|UniProtKB=Q1EQ43	Q1EQ43,Q1EQ43_ENTHI	EhEmp24A;EHI_058320;ortholog	TRANSMEMBRANE EMP24 DOMAIN-CONTAINING PROTEIN 10 (PTHR22811:SF58)	transfer/carrier protein(PC00219);vesicle coat protein(PC00235)
ENTHI|EnsemblGenome=EHI_038590|UniProtKB=Q1EQ40	Q1EQ40,Q1EQ40_ENTHI	EhEmp24D (Fragment);EHI_038590;ortholog	TRANSMEMBRANE EMP24 DOMAIN-CONTAINING PROTEIN 2 (PTHR22811:SF31)	transfer/carrier protein(PC00219);vesicle coat protein(PC00235)
ENTHI|EnsemblGenome=EHI_093130|UniProtKB=Q1EPY3	Q1EPY3,Q1EPY3_ENTHI	EhSec1 (Fragment);EHI_093130;ortholog	PROTEIN ROP (PTHR11679:SF30)	membrane trafficking regulatory protein(PC00151);transporter(PC00227)
ENTHI|EnsemblGenome=EHI_103410|UniProtKB=Q1EQ51	Q1EQ51,Q1EQ51_ENTHI	EhSec31;EHI_103410;ortholog	SEC31 ORTHOLOG, ISOFORM D (PTHR13923:SF11)	vesicle coat protein(PC00235)
ENTHI|EnsemblGenome=EHI_139030|UniProtKB=Q1EQ09	Q1EQ09_ENTHI,Q1EQ09	EhSyntaxin 1A (Fragment);EHI_139030;ortholog	SYNTAXIN-1A (PTHR19957:SF41)	SNARE protein(PC00034)
ENTHI|EnsemblGenome=EHI_196890|UniProtKB=C4LVA7	C4LVA7_ENTHI,C4LVA7	Gamma-adaptin, putative;EHI_196890;ortholog	ADAPTOR PROTEIN COMPLEX 1, GAMMA SUBUNIT, ISOFORM D (PTHR22780:SF5)	transmembrane receptor regulatory/adaptor protein(PC00226)
ENTHI|EnsemblGenome=EHI_154290|UniProtKB=B1N3T5	B1N3T5,B1N3T5_ENTHI	Vacuolar protein sorting-associated protein 45, putative;EHI_154290;ortholog	VACUOLAR PROTEIN SORTING-ASSOCIATED PROTEIN 45 (PTHR11679:SF3)	membrane trafficking regulatory protein(PC00151);transporter(PC00227)
ENTHI|EnsemblGenome=EHI_004640|UniProtKB=C4LYS4	C4LYS4_ENTHI,C4LYS4	Vesicle-fusing ATPase, putative;EHI_004640;ortholog	VESICLE-FUSING ATPASE (PTHR23078:SF3)	hydrolase(PC00121)
OTHER PROTEINS
ENTHI|EnsemblGenome=EHI_053020|UniProtKB=C4M3C0	C4M3C0,C4M3C0_ENTHI	26S protease regulatory subunit, putative;EHI_053020;ortholog	26S PROTEASE REGULATORY SUBUNIT 6A (PTHR23073:SF7)	hydrolase(PC00121)
ENTHI|EnsemblGenome=EHI_180350|UniProtKB=C4M285	C4M285_ENTHI,C4M285	26S protease regulatory subunit, putative;EHI_180350;ortholog	26S PROTEASE REGULATORY SUBUNIT 4 (PTHR23073:SF24)	hydrolase(PC00121)
ENTHI|EnsemblGenome=EHI_158240|UniProtKB=C4M2E3	C4M2E3,C4M2E3_ENTHI	3-ketoacyl-CoA synthase;EHI_158240;ortholog	3-KETOACYL-COA SYNTHASE (PTHR31561:SF23)
ENTHI|EnsemblGenome=EHI_076870|UniProtKB=C4M2S8	C4M2S8_ENTHI,C4M2S8	3-oxo-5-alpha-steroid 4-dehydrogenase domain-containing protein;EHI_076870;ortholog	SC2 (PTHR10556:SF28)	dehydrogenase(PC00092)
ENTHI|EnsemblGenome=EHI_084680|UniProtKB=C4M1J9	C4M1J9,C4M1J9_ENTHI	4-alpha-glucanotransferase, putative;EHI_084680;ortholog	4-ALPHA-GLUCANOTRANSFERASE DPE2 (PTHR32518:SF3)
ENTHI|EnsemblGenome=EHI_148560|UniProtKB=C4LT26	C4LT26_ENTHI,C4LT26	4-alpha-glucanotransferase, putative;EHI_148560;ortholog	4-ALPHA-GLUCANOTRANSFERASE DPE2 (PTHR32518:SF3)
ENTHI|EnsemblGenome=EHI_197030|UniProtKB=C4LVC0	C4LVC0_ENTHI,C4LVC0	40S ribosomal protein S10, putative;EHI_197030;ortholog	RIBOSOMAL PROTEIN S10 (PTHR12146:SF0)	ribosomal protein(PC00202)
ENTHI|EnsemblGenome=EHI_155410|UniProtKB=C4LW92	C4LW92,C4LW92_ENTHI	40S ribosomal protein S11, putative;EHI_155410;ortholog	40S RIBOSOMAL PROTEIN S11-A-RELATED (PTHR10744:SF9)	ribosomal protein(PC00202)
ENTHI|EnsemblGenome=EHI_186720|UniProtKB=C4LVN9	C4LVN9,C4LVN9_ENTHI	40S ribosomal protein S12;EHI_186720;ortholog	40S RIBOSOMAL PROTEIN S12 (PTHR11843:SF0)	ribosomal protein(PC00202)
ENTHI|EnsemblGenome=EHI_035460|UniProtKB=C4LXX7	C4LXX7_ENTHI,C4LXX7	40S ribosomal protein S13, putative;EHI_035460;ortholog	40S RIBOSOMAL PROTEIN S13 (PTHR11885:SF6)	ribosomal protein(PC00202)
ENTHI|EnsemblGenome=EHI_012360|UniProtKB=B1N2I3	B1N2I3_ENTHI,B1N2I3	40S ribosomal protein S14, putative;EHI_012360;ortholog	40S RIBOSOMAL PROTEIN S14 (PTHR11759:SF1)	ribosomal protein(PC00202)
ENTHI|EnsemblGenome=EHI_073600|UniProtKB=C4LXM0	C4LXM0_ENTHI,C4LXM0	40S ribosomal protein S15a, putative;EHI_073600;ortholog	RIBOSOMAL PROTEIN S15A (PTHR11758:SF16)	ribosomal protein(PC00202)
ENTHI|EnsemblGenome=EHI_008010|UniProtKB=B1N316	B1N316_ENTHI,B1N316	40S ribosomal protein S16, putative;EHI_008010;ortholog	40S RIBOSOMAL PROTEIN S16 (PTHR21569:SF4)
ENTHI|EnsemblGenome=EHI_135060|UniProtKB=C4M0Z2	C4M0Z2_ENTHI,C4M0Z2	40S ribosomal protein S17, putative;EHI_135060;ortholog	40S RIBOSOMAL PROTEIN S17 (PTHR10732:SF0)	ribosomal protein(PC00202)
ENTHI|EnsemblGenome=EHI_009680|UniProtKB=C4LZ42	C4LZ42,C4LZ42_ENTHI	40S ribosomal protein S18, putative;EHI_009680;ortholog	40S RIBOSOMAL PROTEIN S18 (PTHR10871:SF3)
ENTHI|EnsemblGenome=EHI_198740|UniProtKB=C4LWS0	C4LWS0_ENTHI,C4LWS0	40S ribosomal protein S19, putative;EHI_198740;ortholog	40S RIBOSOMAL PROTEIN S19A-RELATED (PTHR11710:SF0)	ribosomal protein(PC00202)
ENTHI|EnsemblGenome=EHI_020280|UniProtKB=C4M7U0	C4M7U0,C4M7U0_ENTHI	40S ribosomal protein S2, putative;EHI_020280;ortholog	RIBOSOMAL PROTEIN S2 (PTHR13718:SF4)	ribosomal protein(PC00202)
ENTHI|EnsemblGenome=EHI_140170|UniProtKB=C4M466	C4M466_ENTHI,C4M466	40S ribosomal protein S20, putative;EHI_140170;ortholog	40S RIBOSOMAL PROTEIN S20 (PTHR11700:SF8)	ribosomal protein(PC00202)
ENTHI|EnsemblGenome=EHI_020310|UniProtKB=C4M5B7	C4M5B7,C4M5B7_ENTHI	40S ribosomal protein S23, putative;EHI_020310;ortholog	40S RIBOSOMAL PROTEIN S23 (PTHR11652:SF14)	ribosomal protein(PC00202)
ENTHI|EnsemblGenome=EHI_148820|UniProtKB=C4LT49	C4LT49_ENTHI,C4LT49	40S ribosomal protein S24, putative;EHI_148820;ortholog	40S RIBOSOMAL PROTEIN S24 (PTHR10496:SF0)	ribosomal protein(PC00202)
ENTHI|EnsemblGenome=EHI_177470|UniProtKB=C4LY50	C4LY50_ENTHI,C4LY50	40S ribosomal protein S25, putative;EHI_177470;ortholog	40S RIBOSOMAL PROTEIN S25 (PTHR12850:SF5)
ENTHI|EnsemblGenome=EHI_039010|UniProtKB=C4LZS2	C4LZS2,C4LZS2_ENTHI	40S ribosomal protein S26;EHI_039010;ortholog	40S RIBOSOMAL PROTEIN S26 (PTHR12538:SF0)	ribosomal protein(PC00202)
ENTHI|EnsemblGenome=EHI_146340|UniProtKB=C4LT02	C4LT02_ENTHI,C4LT02	40S ribosomal protein S3, putative;EHI_146340;ortholog	40S RIBOSOMAL PROTEIN S3 (PTHR11760:SF32)	ribosomal protein(PC00202)
ENTHI|EnsemblGenome=EHI_065270|UniProtKB=C4M609	C4M609_ENTHI,C4M609	40S ribosomal protein S3a;EHI_065270;ortholog	40S RIBOSOMAL PROTEIN S3A (PTHR11830:SF0)	cysteine protease(PC00081);ribosomal protein(PC00202)
ENTHI|EnsemblGenome=EHI_118170|UniProtKB=B1N336	B1N336,B1N336_ENTHI	40S ribosomal protein S4, putative;EHI_118170;ortholog	40S RIBOSOMAL PROTEIN S4-RELATED (PTHR11581:SF0)	ribosomal protein(PC00202)
ENTHI|EnsemblGenome=EHI_126110|UniProtKB=C4LVZ6	C4LVZ6_ENTHI,C4LVZ6	40S ribosomal protein S5;EHI_126110;ortholog	40S RIBOSOMAL PROTEIN S5 (PTHR11205:SF18)	ribosomal protein(PC00202)
ENTHI|EnsemblGenome=EHI_013890|UniProtKB=C4LXN2	C4LXN2,C4LXN2_ENTHI	40S ribosomal protein S6;EHI_013890;ortholog	40S RIBOSOMAL PROTEIN S6 (PTHR11502:SF6)
ENTHI|EnsemblGenome=EHI_067530|UniProtKB=C4M9F9	C4M9F9_ENTHI,C4M9F9	40S ribosomal protein S7, putative;EHI_067530;ortholog	40S RIBOSOMAL PROTEIN S7 (PTHR11278:SF0)	ribosomal protein(PC00202)
ENTHI|EnsemblGenome=EHI_140540|UniProtKB=B1N3K9	B1N3K9_ENTHI,B1N3K9	40S ribosomal protein S7, putative;EHI_140540;ortholog	40S RIBOSOMAL PROTEIN S7 (PTHR11278:SF0)	ribosomal protein(PC00202)
ENTHI|EnsemblGenome=EHI_009870|UniProtKB=C4M0Q2	C4M0Q2_ENTHI,C4M0Q2	40S ribosomal protein S8;EHI_009870;ortholog	40S RIBOSOMAL PROTEIN S8 (PTHR10394:SF3)
ENTHI|Gene=11.t00056|UniProtKB=O15612	RS9_ENTHI,O15612	40S ribosomal protein S9;2.t00127;ortholog	40S RIBOSOMAL PROTEIN S9 (PTHR11831:SF5)	ribosomal protein(PC00202)
ENTHI|EnsemblGenome=EHI_081410|UniProtKB=C4M5A0	C4M5A0_ENTHI,C4M5A0	40S ribosomal protein SA;EHI_081410;ortholog	40S RIBOSOMAL PROTEIN SA (PTHR11489:SF9)
ENTHI|EnsemblGenome=EHI_090400|UniProtKB=B1N2Z3	B1N2Z3,B1N2Z3_ENTHI	60S acidic ribosomal protein P0;EHI_090400;ortholog	60S ACIDIC RIBOSOMAL PROTEIN P0 (PTHR45699:SF3)
ENTHI|EnsemblGenome=EHI_044810|UniProtKB=C4LTA0	C4LTA0_ENTHI,C4LTA0	60S ribosomal protein L10, putative;EHI_044810;ortholog	QM PROTEIN (PTHR11726:SF10)	ribosomal protein(PC00202)
ENTHI|EnsemblGenome=EHI_012480|UniProtKB=B1N2I7	B1N2I7_ENTHI,B1N2I7	60S ribosomal protein L10a, putative;EHI_012480;ortholog	RIBOSOMAL PROTEIN (PTHR23105:SF101)	ribosomal protein(PC00202)
ENTHI|EnsemblGenome=EHI_124300|UniProtKB=C4LZG9	C4LZG9,C4LZG9_ENTHI	60S ribosomal protein L11, putative;EHI_124300;ortholog	60S RIBOSOMAL PROTEIN L11 (PTHR11994:SF8)	ribosomal protein(PC00202)
ENTHI|EnsemblGenome=EHI_030710|UniProtKB=C4M1E1	C4M1E1,C4M1E1_ENTHI	60S ribosomal protein L12, putative;EHI_030710;ortholog	60S RIBOSOMAL PROTEIN L12 (PTHR11661:SF2)	ribosomal protein(PC00202)
ENTHI|EnsemblGenome=EHI_017700|UniProtKB=C4M3F3	C4M3F3,C4M3F3_ENTHI	60S ribosomal protein L13, putative;EHI_017700;ortholog	RIBOSOMAL PROTEIN L13A (PTHR11545:SF3)	ribosomal protein(PC00202)
ENTHI|EnsemblGenome=EHI_187150|UniProtKB=C4LVT2	C4LVT2_ENTHI,C4LVT2	60S ribosomal protein L13, putative;EHI_187150;ortholog	60S RIBOSOMAL PROTEIN L13 (PTHR11722:SF0)	ribosomal protein(PC00202)
ENTHI|EnsemblGenome=EHI_050130|UniProtKB=C4LTQ0	C4LTQ0_ENTHI,C4LTQ0	60S ribosomal protein L14, putative;EHI_050130;ortholog	60S RIBOSOMAL PROTEIN L14 (PTHR11127:SF2)
ENTHI|EnsemblGenome=EHI_054740|UniProtKB=C4M2J3	C4M2J3_ENTHI,C4M2J3	60S ribosomal protein L17, putative;EHI_054740;ortholog	RIBOSOMAL PROTEIN L17 (PTHR11593:SF10)
ENTHI|EnsemblGenome=EHI_079190|UniProtKB=C4LXC8	C4LXC8_ENTHI,C4LXC8	60S ribosomal protein L18, putative;EHI_079190;ortholog	60S RIBOSOMAL PROTEIN L18 (PTHR10934:SF2)
ENTHI|EnsemblGenome=EHI_035600|UniProtKB=C4LXZ0	C4LXZ0,C4LXZ0_ENTHI	60S ribosomal protein L18a;EHI_035600;ortholog	60S RIBOSOMAL PROTEIN L18A (PTHR10052:SF1)
ENTHI|EnsemblGenome=EHI_127200|UniProtKB=C4LWZ3	C4LWZ3,C4LWZ3_ENTHI	60S ribosomal protein L2/L8, putative;EHI_127200;ortholog	60S RIBOSOMAL PROTEIN L8 (PTHR13691:SF16)	ribosomal protein(PC00202)
ENTHI|EnsemblGenome=EHI_161180|UniProtKB=C4LV69	C4LV69_ENTHI,C4LV69	60S ribosomal protein L21, putative;EHI_161180;ortholog	RIBOSOMAL PROTEIN L21 (PTHR20981:SF6)
ENTHI|EnsemblGenome=EHI_051710|UniProtKB=C4LVB0	C4LVB0_ENTHI,C4LVB0	60S ribosomal protein L23, putative;EHI_051710;ortholog	60S RIBOSOMAL PROTEIN L23 (PTHR11761:SF8)	ribosomal protein(PC00202)
ENTHI|EnsemblGenome=EHI_030760|UniProtKB=C4LSA0	C4LSA0_ENTHI,C4LSA0	60S ribosomal protein L24, putative;EHI_030760;ortholog	60S RIBOSOMAL PROTEIN L24 (PTHR10792:SF1)	ribosomal protein(PC00202)
ENTHI|EnsemblGenome=EHI_111570|UniProtKB=C4M569	C4M569,C4M569_ENTHI	60S ribosomal protein L26, putative;EHI_111570;ortholog	RIBOSOMAL PROTEIN L26 (PTHR11143:SF7)	ribosomal protein(PC00202)
ENTHI|EnsemblGenome=EHI_152570|UniProtKB=C4LSU3	C4LSU3,C4LSU3_ENTHI	60S ribosomal protein L26, putative;EHI_152570;ortholog	RIBOSOMAL PROTEIN L26 (PTHR11143:SF7)	ribosomal protein(PC00202)
ENTHI|EnsemblGenome=EHI_183480|UniProtKB=C4M727	C4M727_ENTHI,C4M727	60S ribosomal protein L27, putative;EHI_183480;ortholog	60S RIBOSOMAL PROTEIN L27 (PTHR10497:SF0)	ribosomal protein(PC00202)
ENTHI|EnsemblGenome=EHI_005890|UniProtKB=C4LW09	C4LW09,C4LW09_ENTHI	60S ribosomal protein L3, putative;EHI_005890;ortholog	60S RIBOSOMAL PROTEIN L3 (PTHR11363:SF5)	ribosomal protein(PC00202)
ENTHI|EnsemblGenome=EHI_065740|UniProtKB=C4LZZ0	C4LZZ0,C4LZZ0_ENTHI	60S ribosomal protein L30, putative;EHI_065740;ortholog	60S RIBOSOMAL PROTEIN L30 (PTHR11449:SF1)	ribosomal protein(PC00202)
ENTHI|EnsemblGenome=EHI_068200|UniProtKB=C4LU13	C4LU13_ENTHI,C4LU13	60S ribosomal protein L31, putative;EHI_068200;ortholog	RIBOSOMAL PROTEIN L31 (PTHR10956:SF0)	ribosomal protein(PC00202)
ENTHI|EnsemblGenome=EHI_044770|UniProtKB=C4LT96	C4LT96,C4LT96_ENTHI	60S ribosomal protein L32, putative;EHI_044770;ortholog	60S RIBOSOMAL PROTEIN L32 (PTHR23413:SF1)	ribosomal protein(PC00202)
ENTHI|EnsemblGenome=EHI_167050|UniProtKB=C4LYA7	C4LYA7,C4LYA7_ENTHI	60S ribosomal protein L34, putative;EHI_167050;ortholog	FI02850P-RELATED (PTHR10759:SF0)
ENTHI|EnsemblGenome=EHI_014110|UniProtKB=B1N4V3	B1N4V3,B1N4V3_ENTHI	60S ribosomal protein L35a, putative;EHI_014110;ortholog	60S RIBOSOMAL PROTEIN L35A (PTHR10902:SF0)
ENTHI|EnsemblGenome=EHI_000510|UniProtKB=C4LZA2	C4LZA2,C4LZA2_ENTHI	60S ribosomal protein L4, putative;EHI_000510;ortholog	60S RIBOSOMAL PROTEIN L4 (PTHR19431:SF0)
ENTHI|EnsemblGenome=EHI_006860|UniProtKB=C4LU56	C4LU56_ENTHI,C4LU56	60S ribosomal protein L5, putative;EHI_006860;ortholog	60S RIBOSOMAL PROTEIN L5 (PTHR23410:SF12)	ribosomal protein(PC00202)
ENTHI|EnsemblGenome=EHI_067520|UniProtKB=C4M9F8	C4M9F8,C4M9F8_ENTHI	60S ribosomal protein L6, putative;EHI_067520;ortholog	60S RIBOSOMAL PROTEIN L6 (PTHR10715:SF0)	ribosomal protein(PC00202)
ENTHI|EnsemblGenome=EHI_141990|UniProtKB=C4LW44	C4LW44,C4LW44_ENTHI	60S ribosomal protein L7, putative;EHI_141990;ortholog	60S RIBOSOMAL PROTEIN L7 (PTHR11524:SF16)	ribosomal protein(PC00202)
ENTHI|EnsemblGenome=EHI_029530|UniProtKB=B1N3R9	B1N3R9,B1N3R9_ENTHI	60S ribosomal protein L7a, putative;EHI_029530;ortholog	60S RIBOSOMAL PROTEIN L7A (PTHR23105:SF1)	ribosomal protein(PC00202)
ENTHI|EnsemblGenome=EHI_193080|UniProtKB=C4M9B0	C4M9B0_ENTHI,C4M9B0	60S ribosomal protein L9, putative;EHI_193080;ortholog	60S RIBOSOMAL PROTEIN L9 (PTHR11655:SF16)	ribosomal protein(PC00202)
ENTHI|EnsemblGenome=EHI_178960|UniProtKB=C4LUV9	C4LUV9_ENTHI,C4LUV9	Acetyl-CoA synthetase, putative;EHI_178960;ortholog	SUBFAMILY NOT NAMED (PTHR43334:SF1)
ENTHI|EnsemblGenome=EHI_146950|UniProtKB=C4M8S6	C4M8S6,C4M8S6_ENTHI	Acid phosphatase, putative;EHI_146950;ortholog	ACID PHOSPHATASE 1, ISOFORM B (PTHR11567:SF110)	phosphatase(PC00181)
ENTHI|EnsemblGenome=EHI_198760|UniProtKB=C4LWS2	C4LWS2_ENTHI,C4LWS2	Alcohol dehydrogenase 3, putative;EHI_198760;ortholog	ALCOHOL DEHYDROGENASE YQHD (PTHR43633:SF1)	dehydrogenase(PC00092)
ENTHI|EnsemblGenome=EHI_125950|UniProtKB=C4LVY0	C4LVY0_ENTHI,C4LVY0	Alcohol dehydrogenase, putative;EHI_125950;ortholog	ALCOHOL DEHYDROGENASE YQHD (PTHR43633:SF1)	dehydrogenase(PC00092)
ENTHI|EnsemblGenome=EHI_166490|UniProtKB=C4M7F5	C4M7F5_ENTHI,C4M7F5	Alcohol dehydrogenase, putative;EHI_166490;ortholog	ALDEHYDE-ALCOHOL DEHYDROGENASE (PTHR11496:SF91)
ENTHI|EnsemblGenome=EHI_150490|UniProtKB=C4M230	C4M230,C4M230_ENTHI	Aldehyde-alcohol dehydrogenase;EHI_150490;ortholog	ALDEHYDE-ALCOHOL DEHYDROGENASE (PTHR11496:SF91)
ENTHI|EnsemblGenome=EHI_096830|UniProtKB=C4LWJ2	C4LWJ2,C4LWJ2_ENTHI	Alpha-1,4 glucan phosphorylase;EHI_096830;ortholog	GLYCOGEN PHOSPHORYLASE, BRAIN FORM (PTHR11468:SF3)
ENTHI|EnsemblGenome=EHI_138380|UniProtKB=C4M3I0	C4M3I0_ENTHI,C4M3I0	Alpha-1,4 glucan phosphorylase;EHI_138380;ortholog	GLYCOGEN PHOSPHORYLASE, BRAIN FORM (PTHR11468:SF3)
ENTHI|EnsemblGenome=EHI_042170|UniProtKB=C4M4H1	C4M4H1,C4M4H1_ENTHI	Aminoacyl-histidine dipeptidase, putative;EHI_042170;ortholog	CYTOSOL NON-SPECIFIC DIPEPTIDASE (PTHR43501:SF1)	deacetylase(PC00087);metalloprotease(PC00153)
ENTHI|EnsemblGenome=EHI_021340|UniProtKB=C4M049	C4M049_ENTHI,C4M049	Aminopeptidase, putative;EHI_021340;ortholog	SUBFAMILY NOT NAMED (PTHR28570:SF13)	metalloprotease(PC00153)
ENTHI|EnsemblGenome=EHI_008380|UniProtKB=C4M0L4	C4M0L4_ENTHI,C4M0L4	Aminopeptidase;EHI_008380;ortholog	FI19310P1 (PTHR11533:SF174)	metalloprotease(PC00153)
ENTHI|EnsemblGenome=EHI_175050|UniProtKB=C4LZN0	C4LZN0,C4LZN0_ENTHI	Aspartyl-tRNA synthetase, putative;EHI_175050;ortholog	ASPARTATE--TRNA LIGASE, CYTOPLASMIC (PTHR43450:SF1)	RNA binding protein(PC00031);aminoacyl-tRNA synthetase(PC00047)
ENTHI|EnsemblGenome=EHI_163540|UniProtKB=C4M3T5	C4M3T5_ENTHI,C4M3T5	B-keto acyl reductase, putative;EHI_163540;ortholog	SUBFAMILY NOT NAMED (PTHR43391:SF38)	dehydrogenase(PC00092);reductase(PC00198)
ENTHI|EnsemblGenome=EHI_054830|UniProtKB=C4M2K1	C4M2K1_ENTHI,C4M2K1	Calcium-transporting ATPase;EHI_054830;ortholog	PLASMA MEMBRANE CALCIUM-TRANSPORTING ATPASE 4 (PTHR24093:SF369)	cation transporter(PC00068);hydrolase(PC00121);ion channel(PC00133)
ENTHI|EnsemblGenome=EHI_200230|UniProtKB=C4M7M4	C4M7M4_ENTHI,C4M7M4	Cell surface protease gp63, putative;EHI_200230;ortholog	LEISHMANOLYSIN-LIKE PEPTIDASE (PTHR10942:SF0)	cell adhesion molecule(PC00069);metalloprotease(PC00153)
ENTHI|EnsemblGenome=EHI_115300|UniProtKB=C4M8E1	C4M8E1_ENTHI,C4M8E1	Centromere/microtubule binding protein cbf5, putative;EHI_115300;ortholog	H/ACA RIBONUCLEOPROTEIN COMPLEX SUBUNIT 4 (PTHR23127:SF0)	centromere DNA-binding protein(PC00071)
ENTHI|EnsemblGenome=EHI_125800|UniProtKB=C4LVW6	C4LVW6_ENTHI,C4LVW6	Chaperonin-containing TCP-1, zeta subunit, putative;EHI_125800;ortholog	T-COMPLEX PROTEIN 1 SUBUNIT ZETA (PTHR11353:SF21)	chaperonin(PC00073)
ENTHI|EnsemblGenome=EHI_140260|UniProtKB=C4M474	C4M474,C4M474_ENTHI	Copine, putative;EHI_140260;ortholog	COPINE FAMILY PROTEIN 1 (PTHR45751:SF8)
ENTHI|EnsemblGenome=EHI_111990|UniProtKB=C4M7I1	C4M7I1_ENTHI,C4M7I1	CXXC-rich protein;EHI_111990;ortholog	SUBFAMILY NOT NAMED (PTHR10942:SF35)	metalloprotease(PC00153)
ENTHI|EnsemblGenome=EHI_093900|UniProtKB=C4LYI1	C4LYI1,C4LYI1_ENTHI	DEAD/DEAH box helicase, putative;EHI_093900;ortholog	EUKARYOTIC INITIATION FACTOR 4A-III (PTHR24031:SF57)
ENTHI|EnsemblGenome=EHI_011210|UniProtKB=C4M7D4	C4M7D4_ENTHI,C4M7D4	Elongation factor 1-alpha;EHI_011210;ortholog	ELONGATION FACTOR 1-ALPHA (PTHR23115:SF170)	G-protein(PC00020);hydrolase(PC00121);translation elongation factor(PC00222);translation initiation factor(PC00224)
ENTHI|EnsemblGenome=EHI_166810|UniProtKB=B1N306	B1N306,B1N306_ENTHI	Elongation factor 2;EHI_166810;ortholog	ELONGATION FACTOR 2 (PTHR42908:SF10)	G-protein(PC00020);hydrolase(PC00121);translation elongation factor(PC00222);translation initiation factor(PC00224)
ENTHI|EnsemblGenome=EHI_121780|UniProtKB=C4M5C4	C4M5C4_ENTHI,C4M5C4	Enhancer binding protein-1;EHI_121780;ortholog	POLYADENYLATE-BINDING PROTEIN (PTHR24012:SF491)
ENTHI|EnsemblGenome=EHI_182670|UniProtKB=C4LV48	C4LV48_ENTHI,C4LV48	Enhancer binding protein-2, putative;EHI_182670;ortholog	SERINE/ARGININE-RICH-SPLICING FACTOR 5A-RELATED (PTHR23003:SF30)
ENTHI|EnsemblGenome=EHI_130700|UniProtKB=C4LXE8	C4LXE8,C4LXE8_ENTHI	Enolase, putative;EHI_130700;ortholog	ENOLASE (PTHR11902:SF1)
ENTHI|EnsemblGenome=EHI_118840|UniProtKB=C4LYN2	C4LYN2_ENTHI,C4LYN2	Fibrillarin, putative;EHI_118840;ortholog	FIBRILLARIN (PTHR10335:SF0)
ENTHI|EnsemblGenome=EHI_098570|UniProtKB=C4LXD7	C4LXD7,C4LXD7_ENTHI	Fructose-1,6-bisphosphate aldolase, putative;EHI_098570;ortholog	SUBFAMILY NOT NAMED (PTHR30304:SF0)	aldolase(PC00044)
ENTHI|EnsemblGenome=EHI_140350|UniProtKB=C4M483	C4M483,C4M483_ENTHI	G protein alpha subunit, putative;EHI_140350;ortholog	GUANINE NUCLEOTIDE-BINDING PROTEIN G(O) SUBUNIT ALPHA (PTHR10218:SF293)	heterotrimeric G-protein(PC00117)
ENTHI|EnsemblGenome=EHI_094100|UniProtKB=C4LYJ7	C4LYJ7_ENTHI,C4LYJ7	Galactokinase, putative;EHI_094100;ortholog	GALACTOKINASE (PTHR10457:SF6)	carbohydrate kinase(PC00065)
ENTHI|EnsemblGenome=EHI_008200|UniProtKB=C4LVR9	C4LVR9_ENTHI,C4LVR9	Glyceraldehyde-3-phosphate dehydrogenase;EHI_008200;ortholog	GLYCERALDEHYDE-3-PHOSPHATE DEHYDROGENASE (PTHR10836:SF76)	dehydrogenase(PC00092)
ENTHI|EnsemblGenome=EHI_098360|UniProtKB=C4LXB9	C4LXB9,C4LXB9_ENTHI	Glycogen debranching enzyme, putative;EHI_098360;ortholog	GLYCOGEN DEBRANCHING ENZYME (PTHR10569:SF2)	glycosidase(PC00110);glycosyltransferase(PC00111)
ENTHI|EnsemblGenome=EHI_167300|UniProtKB=C4MAF9	C4MAF9_ENTHI,C4MAF9	Grainin 1;EHI_167300;ortholog	SUBFAMILY NOT NAMED (PTHR23064:SF24)
ENTHI|EnsemblGenome=EHI_167310|UniProtKB=Q9NJW1	Q9NJW1_ENTHI,Q9NJW1	Grainin 2;grainin 2;ortholog	SUBFAMILY NOT NAMED (PTHR23064:SF24)
ENTHI|EnsemblGenome=EHI_075040|UniProtKB=B1N4P1	B1N4P1,B1N4P1_ENTHI	GTP-binding protein;EHI_075040;ortholog	GTP-BINDING PROTEIN SAR1B (PTHR45684:SF2)
ENTHI|EnsemblGenome=EHI_050550|UniProtKB=C4LTS8	C4LTS8,C4LTS8_ENTHI	Guanine nucleotide-binding protein subunit beta 2-like 1, putative;EHI_050550;ortholog	RECEPTOR OF ACTIVATED PROTEIN C KINASE 1 (PTHR19868:SF0)
ENTHI|EnsemblGenome=EHI_151600|UniProtKB=C4LSK1	C4LSK1,C4LSK1_ENTHI	Helicase, putative;EHI_151600;ortholog	SPLICEOSOME RNA HELICASE DDX39B (PTHR24031:SF605)
ENTHI|EnsemblGenome=EHI_126210|UniProtKB=C4LW06	C4LW06,C4LW06_ENTHI	Histone H2A;EHI_126210;ortholog	HISTONE H2A (PTHR23430:SF50)	histone(PC00118)
ENTHI|EnsemblGenome=EHI_182990|UniProtKB=C4LV75	C4LV75_ENTHI,C4LV75	Histone H2B;EHI_182990;ortholog	H2B HISTONE FAMILY, MEMBER M (PTHR23428:SF188)
ENTHI|EnsemblGenome=EHI_135080|UniProtKB=C4M0Z4	C4M0Z4_ENTHI,C4M0Z4	Histone H3, putative;EHI_135080;ortholog	HISTONE H3.3-RELATED (PTHR11426:SF179)	histone(PC00118)
ENTHI|EnsemblGenome=EHI_043010|UniProtKB=Q24802	Q24802_ENTHI,Q24802	HM-1-IMSS putative vacuolar proton-transporting ATPase catalytic subunit;EHI_043010;ortholog	V-TYPE PROTON ATPASE CATALYTIC SUBUNIT A (PTHR43607:SF1)	ATP synthase(PC00002);DNA binding protein(PC00009);anion channel(PC00049);ligand-gated ion channel(PC00141);protease(PC00190)
ENTHI|EnsemblGenome=EHI_124880|UniProtKB=C4M982	C4M982,C4M982_ENTHI	Inorganic pyrophosphatase, putative;EHI_124880;ortholog	INORGANIC PYROPHOSPHATASE (PTHR10286:SF3)	pyrophosphatase(PC00196)
ENTHI|EnsemblGenome=EHI_030810|UniProtKB=Q86S08	Q86S08_ENTHI,Q86S08	Malate dehydrogenase;Mdh1;ortholog	MALATE DEHYDROGENASE, CYTOPLASMIC (PTHR23382:SF3)	dehydrogenase(PC00092)
ENTHI|EnsemblGenome=EHI_050330|UniProtKB=B1N2J0	B1N2J0_ENTHI,B1N2J0	Malic enzyme, putative;EHI_050330;ortholog	NADP-DEPENDENT MALIC ENZYME (PTHR43237:SF4)	acyltransferase(PC00042);decarboxylase(PC00089);dehydrogenase(PC00092)
ENTHI|EnsemblGenome=EHI_100320|UniProtKB=C4M0V2	C4M0V2_ENTHI,C4M0V2	Multidrug resistance protein, putative;EHI_100320;ortholog	BILE PIGMENT TRANSPORTER 1-RELATED (PTHR24223:SF344)	ATP-binding cassette (ABC) transporter(PC00003)
ENTHI|EnsemblGenome=EHI_099700|UniProtKB=C4M6H3	C4M6H3,C4M6H3_ENTHI	NAD(FAD)-dependent dehydrogenase, putative;EHI_099700;ortholog	SUBFAMILY NOT NAMED (PTHR13847:SF259)	dehydrogenase(PC00092);oxidase(PC00175)
ENTHI|EnsemblGenome=EHI_014030|UniProtKB=Q24858	Q24858_ENTHI,Q24858	NAD(P) transhydrogenase subunit alpha, putative;EHI_014030;ortholog	NICOTINAMIDE NUCLEOTIDE TRANSHYDROGENASE (PTHR10160:SF19)	dehydrogenase(PC00092)
ENTHI|EnsemblGenome=EHI_122740|UniProtKB=C4M5N2	C4M5N2,C4M5N2_ENTHI	Nucleolar protein Nop56, putative;EHI_122740;ortholog	NUCLEOLAR PROTEIN 56 (PTHR10894:SF0)	ribonucleoprotein(PC00201)
ENTHI|EnsemblGenome=EHI_000610|UniProtKB=C4LZB2	C4LZB2,C4LZB2_ENTHI	Nucleotide binding protein 2, putative;EHI_000610;ortholog	CYTOSOLIC FE-S CLUSTER ASSEMBLY FACTOR NUBP2 (PTHR23264:SF32)
ENTHI|EnsemblGenome=EHI_110720|UniProtKB=C4LUB9	C4LUB9,C4LUB9_ENTHI	PCTP-like protein, putative;EHI_110720;ortholog	SUBFAMILY NOT NAMED (PTHR19308:SF14)
ENTHI|EnsemblGenome=EHI_125840|UniProtKB=O15729	O15729,O15729_ENTHI	Peptidyl-prolyl cis-trans isomerase;CYP1;ortholog	PEPTIDYL-PROLYL CIS-TRANS ISOMERASE 3 (PTHR11071:SF326)
ENTHI|Gene=EHI_139570|UniProtKB=B1N623	B1N623_ENTHI,B1N623	Peroxiredoxin, putative (Fragment);EHI_139570;ortholog	PEROXIREDOXIN-2 (PTHR10681:SF102)	peroxidase(PC00180)
ENTHI|EnsemblGenome=EHI_009860|UniProtKB=C4M0Q1	C4M0Q1,C4M0Q1_ENTHI	Pescadillo homolog;EHI_009860;ortholog	PESCADILLO HOMOLOG (PTHR12221:SF6)	ribosomal protein(PC00202)
ENTHI|EnsemblGenome=EHI_185280|UniProtKB=C4M3Z6	C4M3Z6_ENTHI,C4M3Z6	Phosphoglucomutase/phosphomannomutase family protein;EHI_185280;ortholog	PHOSPHOMANNOMUTASE 45A (PTHR45745:SF1)
ENTHI|EnsemblGenome=EHI_188180|UniProtKB=C4M192	C4M192_ENTHI,C4M192	Phosphoglycerate kinase;EHI_188180;ortholog	PHOSPHOGLYCERATE KINASE (PTHR11406:SF0)	carbohydrate kinase(PC00065)
ENTHI|EnsemblGenome=EHI_086080|UniProtKB=C4M363	C4M363,C4M363_ENTHI	Proteasome endopeptidase complex;EHI_086080;ortholog	PROTEASOME SUBUNIT ALPHA TYPE-RELATED (PTHR11599:SF12)	protease(PC00190)
ENTHI|EnsemblGenome=EHI_030170|UniProtKB=C4M451	C4M451,C4M451_ENTHI	Proteasome regulatory subunit, putative;EHI_030170;ortholog	26S PROTEASOME NON-ATPASE REGULATORY SUBUNIT 7 (PTHR10540:SF7)	metalloprotease(PC00153)
ENTHI|EnsemblGenome=EHI_098060|UniProtKB=C4M4A2	C4M4A2_ENTHI,C4M4A2	Proteasome subunit alpha type;EHI_098060;ortholog	PROTEASOME SUBUNIT ALPHA TYPE-3 (PTHR11599:SF10)	protease(PC00190)
ENTHI|EnsemblGenome=EHI_130960|UniProtKB=C4LXG4	C4LXG4_ENTHI,C4LXG4	Purine nucleoside phosphorylase, putative;EHI_130960;ortholog	FI09636P-RELATED (PTHR43691:SF3)	phosphorylase(PC00187)
ENTHI|EnsemblGenome=EHI_009530|UniProtKB=Q24801	Q24801,Q24801_ENTHI	Pyruvate, phosphate dikinase;EHI_009530;ortholog	PYRUVATE, PHOSPHATE DIKINASE 1, CHLOROPLASTIC (PTHR22931:SF9)	kinase(PC00137)
ENTHI|EnsemblGenome=EHI_051060|UniProtKB=C4LTX6	C4LTX6,C4LTX6_ENTHI	Pyruvate:ferredoxin oxidoreductase;EHI_051060;ortholog	PYRUVATE-FLAVODOXIN OXIDOREDUCTASE-RELATED (PTHR32154:SF0)	reductase(PC00198)
ENTHI|EnsemblGenome=EHI_020300|UniProtKB=C4M7U2	C4M7U2_ENTHI,C4M7U2	Ribosomal protein L15;EHI_020300;ortholog	60S RIBOSOMAL PROTEIN L15-A-RELATED (PTHR11847:SF4)	ribosomal protein(PC00202)
ENTHI|EnsemblGenome=EHI_110340|UniProtKB=C4LU86	C4LU86,C4LU86_ENTHI	Ribosomal protein L19;EHI_110340;ortholog	RIBOSOMAL PROTEIN L19 (PTHR10722:SF0)	ribosomal protein(PC00202)
ENTHI|EnsemblGenome=EHI_182850|UniProtKB=C4LV64	C4LV64_ENTHI,C4LV64	Ribosomal protein L23A, putative;EHI_182850;ortholog	RIBOSOMAL PROTEIN L23A (PTHR11620:SF2)	ribosomal protein(PC00202)
ENTHI|EnsemblGenome=EHI_029200|UniProtKB=C4MAW7	C4MAW7,C4MAW7_ENTHI	Ribosome biogenesis protein, putative;EHI_029200;ortholog	RIBOSOME PRODUCTION FACTOR 2 HOMOLOG (PTHR12728:SF0)	nuclease(PC00170)
ENTHI|EnsemblGenome=EHI_098810|UniProtKB=C4M883	C4M883,C4M883_ENTHI	Ribosome biogenesis regulatory protein, putative;EHI_098810;ortholog	RIBOSOME BIOGENESIS REGULATORY PROTEIN HOMOLOG (PTHR17602:SF4)	ribosomal protein(PC00202)
ENTHI|EnsemblGenome=EHI_026440|UniProtKB=C4M5W4	C4M5W4,C4M5W4_ENTHI	RNA recognition motif domain containing protein;EHI_026440;ortholog	POLYMERASE DELTA-INTERACTING PROTEIN 3 (PTHR19965:SF35)	RNA binding protein(PC00031)
ENTHI|EnsemblGenome=EHI_055830|UniProtKB=B1N2M7	B1N2M7_ENTHI,B1N2M7	rRNA processing protein, putative;EHI_055830;ortholog	RRNA-PROCESSING PROTEIN EBP2-RELATED (PTHR13028:SF0)
ENTHI|EnsemblGenome=EHI_092640|UniProtKB=C4LV24	C4LV24_ENTHI,C4LV24	Seryl-tRNA synthetase, putative;EHI_092640;ortholog	SERINE--TRNA LIGASE, CYTOPLASMIC (PTHR11778:SF7)	RNA binding protein(PC00031);aminoacyl-tRNA synthetase(PC00047)
ENTHI|EnsemblGenome=EHI_194400|UniProtKB=C4LZV3	C4LZV3_ENTHI,C4LZV3	SNF7 family protein;EHI_194400;ortholog	CHARGED MULTIVESICULAR BODY PROTEIN 2A (PTHR10476:SF4)
ENTHI|EnsemblGenome=EHI_183900|UniProtKB=C4MAW3	C4MAW3,C4MAW3_ENTHI	SnoRNA binding protein, putative;EHI_183900;ortholog	NUCLEOLAR PROTEIN 58 (PTHR10894:SF1)	ribonucleoprotein(PC00201)
ENTHI|EnsemblGenome=EHI_155220|UniProtKB=C4LW75	C4LW75_ENTHI,C4LW75	T-complex protein 1 subunit alpha, putative;EHI_155220;ortholog	T-COMPLEX PROTEIN 1 SUBUNIT ALPHA (PTHR11353:SF84)	chaperonin(PC00073)
ENTHI|EnsemblGenome=EHI_114120|UniProtKB=C4M419	C4M419,C4M419_ENTHI	T-complex protein 1 subunit delta;EHI_114120;ortholog	T-COMPLEX PROTEIN 1 SUBUNIT DELTA (PTHR11353:SF26)	chaperonin(PC00073)
ENTHI|EnsemblGenome=EHI_158250|UniProtKB=C4M2E4	C4M2E4,C4M2E4_ENTHI	T-complex protein 1 subunit gamma;EHI_158250;ortholog	T-COMPLEX PROTEIN 1 SUBUNIT GAMMA (PTHR11353:SF24)	chaperonin(PC00073)
ENTHI|Gene=EHI_071600|UniProtKB=B1N510	B1N510_ENTHI,B1N510	T-complex protein 1 subunitTheta, putative;EHI_071600;ortholog	CHAPERONIN-CONTAINING TCP1, SUBUNIT 8 (THETA) (PTHR11353:SF19)	chaperonin(PC00073)
ENTHI|EnsemblGenome=EHI_056480|UniProtKB=C4M6Z7	C4M6Z7_ENTHI,C4M6Z7	Triosephosphate isomerase;EHI_056480;ortholog	TRIOSEPHOSPHATE ISOMERASE (PTHR21139:SF15)	isomerase(PC00135)
ENTHI|EnsemblGenome=EHI_096710|UniProtKB=B1N2F9	B1N2F9,B1N2F9_ENTHI	Type A flavoprotein, putative;EHI_096710;ortholog	SUBFAMILY NOT NAMED (PTHR32145:SF11)	endoribonuclease(PC00094);mRNA polyadenylation factor(PC00146)
ENTHI|EnsemblGenome=EHI_001130|UniProtKB=C4M1J3	C4M1J3,C4M1J3_ENTHI	Uncharacterized protein;EHI_001130;ortholog	CALSEQUESTRIN (PTHR10033:SF0)
ENTHI|EnsemblGenome=EHI_005150|UniProtKB=C4M0A8	C4M0A8_ENTHI,C4M0A8	Uncharacterized protein;EHI_005150;ortholog	STAPHYLOCOCCAL NUCLEASE DOMAIN-CONTAINING PROTEIN 1 (PTHR12302:SF2)	nucleic acid binding(PC00171);transcription cofactor(PC00217)
ENTHI|EnsemblGenome=EHI_010340|UniProtKB=C4LYT1	C4LYT1_ENTHI,C4LYT1	Uncharacterized protein;EHI_010340;ortholog	SUBFAMILY NOT NAMED (PTHR35899:SF1)
ENTHI|EnsemblGenome=EHI_015300|UniProtKB=C4M0W8	C4M0W8,C4M0W8_ENTHI	Uncharacterized protein;EHI_015300;ortholog	GH09096P (PTHR12422:SF1)
ENTHI|EnsemblGenome=EHI_039860|UniProtKB=C4MA90	C4MA90,C4MA90_ENTHI	Uncharacterized protein;EHI_039860;ortholog	ACID PHOSPHATASE 1, ISOFORM B (PTHR11567:SF110)	phosphatase(PC00181)
ENTHI|EnsemblGenome=EHI_049950|UniProtKB=C4LUJ3	C4LUJ3,C4LUJ3_ENTHI	Uncharacterized protein;EHI_049950;ortholog	PROTEIN DEFECTIVE IN EXINE FORMATION 1 (PTHR21419:SF23)
ENTHI|EnsemblGenome=EHI_057700|UniProtKB=C4M705	C4M705_ENTHI,C4M705	Uncharacterized protein;EHI_057700;ortholog	TRANSMEMBRANE PROTEIN 144 (PTHR16119:SF17)
ENTHI|EnsemblGenome=EHI_065630|UniProtKB=C4LZX9	C4LZX9,C4LZX9_ENTHI	Uncharacterized protein;EHI_065630;ortholog	PROTEIN DEK (PTHR13468:SF1)
ENTHI|EnsemblGenome=EHI_069560|UniProtKB=C4LWP4	C4LWP4,C4LWP4_ENTHI	Uncharacterized protein;EHI_069560;ortholog	MANNOSE 6-PHOSPHATE RECEPTOR-LIKE PROTEIN 1 (PTHR15071:SF0)	receptor(PC00197)
ENTHI|EnsemblGenome=EHI_096320|UniProtKB=C4LWE5	C4LWE5_ENTHI,C4LWE5	Uncharacterized protein;EHI_096320;ortholog	MANNOSE 6-PHOSPHATE RECEPTOR-LIKE PROTEIN 1 (PTHR15071:SF0)	receptor(PC00197)
ENTHI|EnsemblGenome=EHI_098800|UniProtKB=C4M882	C4M882,C4M882_ENTHI	Uncharacterized protein;EHI_098800;ortholog	SUBFAMILY NOT NAMED (PTHR43245:SF11)	dehydratase(PC00091);epimerase/racemase(PC00096);oxidoreductase(PC00176)
ENTHI|EnsemblGenome=EHI_099760|UniProtKB=C4M6H0	C4M6H0,C4M6H0_ENTHI	Uncharacterized protein;EHI_099760;ortholog	RIBOSOME BIOGENESIS PROTEIN NSA2 HOMOLOG (PTHR12642:SF0)
ENTHI|EnsemblGenome=EHI_101240|UniProtKB=C4M8B5	C4M8B5,C4M8B5_ENTHI	Uncharacterized protein;EHI_101240;ortholog	STAPHYLOCOCCAL NUCLEASE DOMAIN-CONTAINING PROTEIN 1 (PTHR12302:SF2)	nucleic acid binding(PC00171);transcription cofactor(PC00217)
ENTHI|EnsemblGenome=EHI_110690|UniProtKB=C4LUB6	C4LUB6,C4LUB6_ENTHI	Uncharacterized protein;EHI_110690;ortholog	SH3 AND PX DOMAIN-CONTAINING PROTEIN 2A (PTHR15706:SF2)
ENTHI|EnsemblGenome=EHI_127030|UniProtKB=C4LWX8	C4LWX8,C4LWX8_ENTHI	Uncharacterized protein;EHI_127030;ortholog	SUBFAMILY NOT NAMED (PTHR35899:SF1)
ENTHI|EnsemblGenome=EHI_131000|UniProtKB=C4LXG8	C4LXG8,C4LXG8_ENTHI	Uncharacterized protein;EHI_131000;ortholog	GH09096P (PTHR12422:SF1)
ENTHI|EnsemblGenome=EHI_141940|UniProtKB=C4LW40	C4LW40_ENTHI,C4LW40	Uncharacterized protein;EHI_141940;ortholog	60S RIBOSOMAL PROTEIN L22-RELATED (PTHR10064:SF0)	ribosomal protein(PC00202)
ENTHI|EnsemblGenome=EHI_152220|UniProtKB=C4LSR0	C4LSR0,C4LSR0_ENTHI	Uncharacterized protein;EHI_152220;ortholog	SUBFAMILY NOT NAMED (PTHR35899:SF1)
ENTHI|EnsemblGenome=EHI_168230|UniProtKB=C4M4Q9	C4M4Q9_ENTHI,C4M4Q9	Uncharacterized protein;EHI_168230;ortholog	RRP15-LIKE PROTEIN (PTHR13245:SF14)
ENTHI|EnsemblGenome=EHI_181140|UniProtKB=C4M602	C4M602,C4M602_ENTHI	Uncharacterized protein;EHI_181140;ortholog	E3 UBIQUITIN-PROTEIN LIGASE MIB2 (PTHR24202:SF4)	ubiquitin-protein ligase(PC00234)
ENTHI|EnsemblGenome=EHI_182770|UniProtKB=C4LV58	C4LV58,C4LV58_ENTHI	Uncharacterized protein;EHI_182770;ortholog	SUBFAMILY NOT NAMED (PTHR35899:SF1)
ENTHI|EnsemblGenome=EHI_198680|UniProtKB=C4LWR4	C4LWR4_ENTHI,C4LWR4	Uncharacterized protein;EHI_198680;ortholog	PROTEIN DEK (PTHR13468:SF1)
ENTHI|EnsemblGenome=EHI_106350|UniProtKB=C4M399	C4M399,C4M399_ENTHI	V-type proton ATPase subunit;EHI_106350;ortholog	V-TYPE PROTON ATPASE SUBUNIT D 1 (PTHR11028:SF0)	ATP synthase(PC00002);hydrolase(PC00121)
